# Supplementary material for: Phosphorus carbides: theory and experiment
Source: Royal Society of Chemistry journal article supplement (doi:10.1039/b402740j), 2004-01-01
Supplement: b402740j.doc [file b402740j.doc]

**Supplementary information Phosphorus Carbides: Theory and Experiment**

# F. Claeyssens, G.M. Fuge, N.L. Allan, P.W. May and M.N.R. Ashfold

| Structure | (A) | (B) | (C) | (D) |
| --- | --- | --- | --- | --- |
| Space group | *Pmn21* | *P1* | *Pbam* | *Pm* |
| a (/Å) | 2.64 | 2.66 | 2.64 | 4.65 |
| b (/Å) | 9.14 | 2.66 | 9.03 | 2.64 |
| c (/Å) | 7.10 | 11.71 | 7.81 | 7.04 |
|  (/º) | 90.0 | 89.9 | 90.0 | 90.0 |
|  (/º) | 90.0 | 90.0 | 90.0 | 99.0 |
|  (/º) | 90.0 | 120.0 | 90.0 | 90.0 |
| C | 0.50000  0.90855  0.72733 | 0.33323  0.66739  0.58287 | -0.76293  -0.24894  -0.50000 | 0.25022  -0.00000  0.42968 |
| C | 0.50000  0.01666  0.23595 | 0.66685  0.33477  0.40789 | -0.78718  -0.17874  0.00000 | 0.39253  0.50000  0.43163 |
| C | 0.00000  0.24413  0.20763 | 0.66667  0.33437  0.53867 | -0.79140  -0.89789  -0.50000 | 0.69619  0.50000  0.43016 |
| C | 0.00000  0.13692  0.75834 | 0.33335  0.66662  0.71498 |  | 0.27761  0.50000  -0.04302 |
| C | 0.50000  0.20867  0.77035 | 0.66685  0.33321  0.75925 |  | 0.58227  0.50000  -0.04128 |
| C | 0.50000  0.51257  0.28618 | 0.66707  0.33241  0.89011 |  | 0.13656  -0.00000  -0.04107 |
| P | 0.50000  0.38814  0.84828 | 0.33342  0.66818  0.33270 | -0.64413  -0.49638  0.00000 | 0.79510  -0.00000  0.02526 |
| P | 0.50000  0.35132  0.16373 | 0.33373  0.66525  0.96556 |  | 0.87714  0.00000  0.36342 |

| Structure | (E) | (F) | (G) | (H) |
| --- | --- | --- | --- | --- |
| Space group | *Pmc21* | *Pm* | *Pm* | *P1* |
| a (/Å) | 2.61 | 2.65 | 9.14 | 4.51 |
| b (/Å) | 9.09 | 7.14 | 6.47 | 2.62 |
| c (/Å) | 6.77 | 4.58 | 2.59 | 7.24 |
|  (/º) | 90.0 | 84.3 | 90.0 | 90.0 |
|  (/º) | 90.0 | 90.0 | 90.0 | 90.5 |
|  (/º) | 90.0 | 90.0 | 90.0 | 89.9 |
| C | -0.50000  -0.49779  0.73240 | 0.50000  0.08645  0.22793 | -0.00766  0.61153  0.44997 | 0.19755  0.00000  0.45206 |
| C | 0.00000  -0.42895  0.71165 | 0.50000  1.03871  0.52033 | 0.00875  0.37006  0.44979 | 0.35917  0.50000  0.40675 |
| C | 0.00000  -0.23096  1.36647 | 0.50000  0.45308  0.75693 | 0.26579  0.76602  -0.05008 | 0.64005  0.50000  0.34565 |
| C | -0.50000  -0.00097  0.78870 | 0.50000  0.46326  0.44904 | 0.33408  0.79643  0.44963 | 0.80001  0.00000  0.71625 |
| C | 0.00000  0.06948  0.81656 | -0.00000  0.12313  0.05905 | 0.76594  0.71551  -0.04851 | 0.66184  0.50000  0.73605 |
| C | -0.50000  -0.14954  0.72608 | 0.00000  0.46328  0.30637 | 0.83408  0.68503  0.45116 | 0.12136  0.00000  0.66542 |
| P | 0.00000  -0.24138  0.63898 | -0.00000  0.96477  0.74672 | 0.07186  0.76213  -0.05045 | 0.28149  0.50000  0.80294 |
| P | -0.50000  -0.69397  0.71925 | 0.00000  0.38779  0.96094 | 0.57193  0.72005  -0.04966 | 0.86248  0.00000  0.27691 |
| C |  |  | 0.73525  0.21536  -0.04907 |  |
| C |  |  | 0.66697  0.18500  0.45038 |  |
| C |  |  | 0.49237  0.87017  0.44996 |  |
| C |  |  | 0.50858  0.11168  0.44964 |  |
| C |  |  | 0.23517  0.26600  -0.05036 |  |
| C |  |  | 0.16702  0.29645  0.44927 |  |
| P |  |  | 0.92916  0.21985  -0.04994 |  |
| P |  |  | 0.42918  0.26225  -0.05071 |  |
